# Supplementary material
Source: PubMed Central journal article supplement (PMC3594257)
Supplement: cc-12-555-s01.pdf [file cc-12-555-s01.pdf]

## **Supplemental Material to:**

**Javier A. Menendez, Jorge Joven, Gerard Aragonès,  
Enrique Barrajon-Catalán, Raúl Beltrán-Debón, Isabel Borrás-Linares,  
Jordi Camps, Bruna Corominas-Faja, Sílvia Cufí, Salvador Fernández-  
Arroyo, Anabel Garcia-Heredia, Ana Hernández-Aguilar, María Herranz-  
López, Cecilia Jiménez-Sánchez, Eugeni López-Bonet, Jesús Lozano-  
Sánchez, Fedra Luciano-Mateo, Begoña Martin-Castillo, Vicente  
Martin-Paredero, Almudena Pérez-Sánchez, Cristina Oliveras-Ferraro,  
Marta Rierra-Borrull, Esther Rodríguez-Gallego, Rosa Quirantes-Piné,  
Anna Rull, Laura Tomás-Menor, Alejandro Vazquez-Martin, Carlos Alonso-  
Villaverde, Vicente Micol and Antonio Segura-Carretero**

**Xenohormetic and anti-aging activity of secoiridoid  
polyphenols present in extra virgin olive oil: A new family  
of gerosuppressant agents**

**2013; 12(4)**

**<http://dx.doi.org/10.4161/cc.23756>**

**<http://www.landesbioscience.com/journals/cc/article/23756>**

**Table 1. Gene transcripts differentially up-regulated (red) and down-regulated (green) in JIMT1 human breast cancer cells treated with the secoiridoids-rich EVOO-PE7 (2 µg/mL) for 6 h.**

| <b>ID</b> | <b>Symbol</b>   | <b>Entrez Gene Name</b>                                                | <b>Fold Change</b> |
|-----------|-----------------|------------------------------------------------------------------------|--------------------|
| NM_005252 | <b>FOS</b>      | FBJ murine osteosarcoma viral oncogene homolog                         | <b>20,027</b>      |
| NM_002422 | <b>MMP3</b>     | matrix metalloproteinase 3 (stromelysin 1, progelatinase)              | <b>17,034</b>      |
| NM_002166 | <b>ID2</b>      | inhibitor of DNA binding 2, dominant negative helix-loop-helix protein | <b>16,740</b>      |
| NM_016084 | <b>RASD1</b>    | RAS, dexamethasone-induced 1                                           | <b>16,320</b>      |
| NM_002923 | <b>RGS2</b>     | regulator of G-protein signaling 2, 24kDa                              | <b>15,296</b>      |
| NM_002155 | <b>HSPA6</b>    | heat shock 70kDa protein 6 (HSP70B')                                   | <b>15,182</b>      |
| NM_002421 | <b>MMP1</b>     | matrix metalloproteinase 1 (interstitial collagenase)                  | <b>12,820</b>      |
| NM_001964 | <b>EGR1</b>     | early growth response 1                                                | <b>12,431</b>      |
| NM_015675 | <b>GADD45B</b>  | growth arrest and DNA-damage-inducible, beta                           | <b>11,400</b>      |
| NM_006732 | <b>FOSB</b>     | FBJ murine osteosarcoma viral oncogene homolog B                       | <b>11,064</b>      |
| NM_005985 | <b>SNAI1</b>    | snail homolog 1 (Drosophila)                                           | <b>9,328</b>       |
| NM_004024 | <b>ATF3</b>     | activating transcription factor 3                                      | <b>9,240</b>       |
| NM_182491 | <b>ZFAND2A</b>  | zinc finger, AN1-type domain 2A                                        | <b>7,763</b>       |
| NM_006705 | <b>GADD45G</b>  | growth arrest and DNA-damage-inducible, gamma                          | <b>7,154</b>       |
| NM_052957 | <b>ACRC</b>     | acidic repeat containing                                               | <b>7,120</b>       |
| NM_001124 | <b>ADM</b>      | adrenomedullin                                                         | <b>7,070</b>       |
| NM_000076 | <b>CDKN1C</b>   | cyclin-dependent kinase inhibitor 1C (p57, Kip2)                       | <b>6,852</b>       |
| NM_004417 | <b>DUSP1</b>    | dual specificity phosphatase 1                                         | <b>6,611</b>       |
| NM_014330 | <b>PPP1R15A</b> | protein phosphatase 1, regulatory (inhibitor) subunit 15A              | <b>6,260</b>       |
| NM_001901 | <b>CTGF</b>     | connective tissue growth factor                                        | <b>6,144</b>       |
| NM_018602 | <b>DNAJA4</b>   | DnaJ (Hsp40) homolog, subfamily A, member 4                            | <b>6,120</b>       |
| NM_001965 | <b>EGR4</b>     | early growth response 4                                                | <b>5,885</b>       |
| NM_025237 | <b>SOST</b>     | sclerostin                                                             | <b>5,817</b>       |
| NM_015193 | <b>ARC</b>      | activity-regulated cytoskeleton-associated protein                     | <b>5,765</b>       |
| NM_005261 | <b>GEM</b>      | GTP binding protein overexpressed in skeletal muscle                   | <b>5,731</b>       |
| NM_005618 | <b>DLL1</b>     | delta-like 1 (Drosophila)                                              | <b>5,673</b>       |
| NM_021127 | <b>PMAIP1</b>   | phorbol-12-myristate-13-acetate-induced protein 1                      | <b>5,590</b>       |
| NR_003038 | <b>SNHG5</b>    | small nucleolar RNA host gene 5 (non-protein coding)                   | <b>5,538</b>       |

|           |                 |                                                                                   |       |
|-----------|-----------------|-----------------------------------------------------------------------------------|-------|
| NM_002928 | <b>RGS16</b>    | regulator of G-protein signaling 16                                               | 5,480 |
| NM_005168 | <b>RND3</b>     | Rho family GTPase 3                                                               | 5,480 |
| NM_003311 | <b>PHLDA2</b>   | pleckstrin homology-like domain, family A, member 2                               | 5,013 |
| BC001892  | <b>C1ORF63</b>  | chromosome 1 open reading frame 63                                                | 4,910 |
| NM_005461 | <b>MAFB</b>     | v-maf musculoaponeurotic fibrosarcoma oncogene homolog B (avian)                  | 4,753 |
| NM_001924 | <b>GADD45A</b>  | growth arrest and DNA-damage-inducible, alpha                                     | 4,731 |
| NM_013262 | <b>MYLIP</b>    | myosin regulatory light chain interacting protein                                 | 4,630 |
| NM_007314 | <b>ABL2</b>     | v-abl Abelson murine leukemia viral oncogene homolog 2                            | 4,567 |
| NM_152608 | <b>C1ORF55</b>  | chromosome 1 open reading frame 55                                                | 4,516 |
| NM_018088 | <b>FAM90A1</b>  | family with sequence similarity 90, member A1                                     | 4,500 |
| NM_006889 | <b>CD86</b>     | CD86 molecule                                                                     | 4,403 |
| NM_000584 | <b>IL8</b>      | interleukin 8                                                                     | 4,354 |
| NM_005771 | <b>DHRS9</b>    | dehydrogenase/reductase (SDR family) member 9                                     | 4,318 |
| AA593970  | <b>MXD1</b>     | MAX dimerization protein 1                                                        | 4,318 |
| NM_004165 | <b>RRAD</b>     | Ras-related associated with diabetes                                              | 4,310 |
| NM_182597 | <b>C7ORF53</b>  | chromosome 7 open reading frame 53                                                | 4,245 |
| NM_004083 | <b>DDIT3</b>    | DNA-damage-inducible transcript 3                                                 | 4,225 |
| NM_005853 | <b>IRX5</b>     | iroquois homeobox 5                                                               | 4,205 |
| NM_001300 | <b>KLF6</b>     | Kruppel-like factor 6                                                             | 4,000 |
| BC030138  | <b>MED26</b>    | mediator complex subunit 26                                                       | 3,940 |
| NM_014905 | <b>GLS</b>      | glutaminase                                                                       | 3,900 |
| NM_000389 | <b>CDKN1A</b>   | cyclin-dependent kinase inhibitor 1A (p21, Cip1)                                  | 3,880 |
| NM_006362 | <b>NXF1</b>     | nuclear RNA export factor 1                                                       | 3,824 |
| NM_018661 | <b>DEFB103B</b> | defensin, beta 103B                                                               | 3,813 |
| NM_002970 | <b>SAT1</b>     | spermidine/spermine N1-acetyltransferase 1                                        | 3,790 |
| NM_181726 | <b>ANKRD37</b>  | ankyrin repeat domain 37                                                          | 3,778 |
| NM_005842 | <b>SPRY2</b>    | sprouty homolog 2 (Drosophila)                                                    | 3,771 |
| NM_021724 | <b>NR1D1</b>    | nuclear receptor subfamily 1, group D, member 1                                   | 3,760 |
| NM_006079 | <b>CITED2</b>   | Cbp/p300-interacting transactivator, with Glu/Asp-rich carboxy-terminal domain, 2 | 3,756 |
| BC020539  | <b>FNIP1</b>    | folliculin interacting protein 1                                                  | 3,751 |
| NM_144660 | <b>SAMD8</b>    | sterile alpha motif domain containing 8                                           | 3,747 |
| NM_013376 | <b>SERTAD1</b>  | SERTA domain containing 1                                                         | 3,710 |
| NM_013347 | <b>RPA4</b>     | replication protein A4, 30kDa                                                     | 3,701 |
| NM_004226 | <b>STK17B</b>   | serine/threonine kinase 17b                                                       | 3,681 |
| NM_012328 | <b>DNAJB9</b>   | DnaJ (Hsp40) homolog, subfamily B, member 9                                       | 3,655 |

|              |                 |                                                                         |              |
|--------------|-----------------|-------------------------------------------------------------------------|--------------|
| NM_198833    | <b>SERPINB8</b> | serpin peptidase inhibitor, clade B (ovalbumin), member 8               | <b>3,635</b> |
| NM_003733    | <b>OASL</b>     | 2'-5'-oligoadenylate synthetase-like                                    | <b>3,625</b> |
| NM_138440    | <b>VASN</b>     | vasorin                                                                 | <b>3,622</b> |
| NM_000565    | <b>IL6R</b>     | interleukin 6 receptor                                                  | <b>3,597</b> |
| NM_003749    | <b>IRS2</b>     | insulin receptor substrate 2                                            | <b>3,587</b> |
| NM_000067    | <b>CA2</b>      | carbonic anhydrase II                                                   | <b>3,492</b> |
| NM_004561    | <b>OVOL1</b>    | ovo-like 1(Drosophila)                                                  | <b>3,491</b> |
| NM_004418    | <b>DUSP2</b>    | dual specificity phosphatase 2                                          | <b>3,490</b> |
| AK128645     | <b>SDCBP</b>    | syndecan binding protein (syntenin)                                     | <b>3,384</b> |
| NM_015000    | <b>STK38L</b>   | serine/threonine kinase 38 like                                         | <b>3,368</b> |
| NM_001885    | <b>CRYAB</b>    | crystallin, alpha B                                                     | <b>3,345</b> |
| BC020867     | <b>SLC6A13</b>  | solute carrier family 6 (neurotransmitter transporter, GABA), member 13 | <b>3,340</b> |
| NM_002130    | <b>HMGCS1</b>   | 3-hydroxy-3-methylglutaryl-CoA synthase 1 (soluble)                     | <b>3,340</b> |
| NM_016270    | <b>KLF2</b>     | Kruppel-like factor 2 (lung)                                            | <b>3,331</b> |
| NM_001005217 | <b>FRG2</b>     | FSHD region gene 2                                                      | <b>3,318</b> |
| NM_016569    | <b>TBX3</b>     | T-box 3                                                                 | <b>3,290</b> |
| NM_014851    | <b>KLHL21</b>   | kelch-like 21 (Drosophila)                                              | <b>3,288</b> |
| NM_025201    | <b>PLEKHO2</b>  | pleckstrin homology domain containing, family O member 2                | <b>3,254</b> |
| NM_002357    | <b>MXD1</b>     | MAX dimerization protein 1                                              | <b>3,250</b> |
| NM_012323    | <b>MAFF</b>     | v-maf musculoaponeurotic fibrosarcoma oncogene homolog F (avian)        | <b>3,250</b> |
| NM_014007    | <b>ZBTB43</b>   | zinc finger and BTB domain containing 43                                | <b>3,234</b> |
| NM_183376    | <b>ARRDC4</b>   | arrestin domain containing 4                                            | <b>3,209</b> |
| NM_004419    | <b>DUSP5</b>    | dual specificity phosphatase 5                                          | <b>3,202</b> |
| NM_152621    | <b>SGMS2</b>    | sphingomyelin synthase 2                                                | <b>3,174</b> |
| NM_017664    | <b>ANKRD10</b>  | ankyrin repeat domain 10                                                | <b>3,156</b> |
| NM_024616    | <b>C3ORF52</b>  | chromosome 3 open reading frame 52                                      | <b>3,151</b> |
| NM_012118    | <b>CCR4L</b>    | CCR4 carbon catabolite repression 4-like (S. cerevisiae)                | <b>3,145</b> |
| NM_012342    | <b>BAMBI</b>    | BMP and activin membrane-bound inhibitor homolog (Xenopus laevis)       | <b>3,137</b> |
| NM_003811    | <b>TNFSF9</b>   | tumor necrosis factor (ligand) superfamily, member 9                    | <b>3,090</b> |
| NM_001514    | <b>GTF2B</b>    | general transcription factor IIB                                        | <b>3,084</b> |
| NM_025195    | <b>TRIB1</b>    | tribbles homolog 1 (Drosophila)                                         | <b>3,080</b> |
| NM_203339    | <b>CLU</b>      | clusterin                                                               | <b>3,079</b> |
| NR_002578    | <b>GAS5</b>     | growth arrest-specific 5 (non-protein coding)                           | <b>3,076</b> |
| NM_053044    | <b>HTRA3</b>    | HtrA serine peptidase 3                                                 | <b>3,057</b> |
| NM_004364    | <b>CEBPA</b>    | CCAAT/enhancer binding protein (C/EBP), alpha                           | <b>3,050</b> |

|              |                   |                                                                                |       |
|--------------|-------------------|--------------------------------------------------------------------------------|-------|
| NM_004071    | <b>CLK1</b>       | CDC-like kinase 1                                                              | 3,050 |
| NM_002133    | <b>HMOX1</b>      | heme oxygenase (decycling) 1                                                   | 3,040 |
| NM_001946    | <b>DUSP6</b>      | dual specificity phosphatase 6                                                 | 3,032 |
| NM_020177    | <b>FEM1C</b>      | fem-1 homolog c (C. elegans)                                                   | 3,030 |
| NM_000861    | <b>HRH1</b>       | histamine receptor H1                                                          | 3,030 |
| NM_198219    | <b>ING1</b>       | inhibitor of growth family, member 1                                           | 3,013 |
| NM_002135    | <b>NR4A1</b>      | nuclear receptor subfamily 4, group A, member 1                                | 2,973 |
| NM_015472    | <b>WWTR1</b>      | WW domain containing transcription regulator 1                                 | 2,930 |
| NM_001731    | <b>BTG1</b>       | B-cell translocation gene 1, anti-proliferative                                | 2,914 |
| NM_001008540 | <b>CXCR4</b>      | chemokine (C-X-C motif) receptor 4                                             | 2,910 |
| NM_006572    | <b>GNA13</b>      | guanine nucleotide binding protein (G protein), alpha 13                       | 2,906 |
| NM_152407    | <b>GRPEL2</b>     | GrpE-like 2, mitochondrial (E. coli)                                           | 2,894 |
| NM_003516    | <b>HIST2H2AA3</b> | histone cluster 2, H2aa3                                                       | 2,880 |
| NM_020127    | <b>TUFT1</b>      | tuftelin 1                                                                     | 2,877 |
| NM_024640    | <b>YRDC</b>       | yrdC domain containing (E. coli)                                               | 2,871 |
| NM_001006641 | <b>SLC25A25</b>   | solute carrier family 25 (mitochondrial carrier; phosphate carrier), member 25 | 2,869 |
| XM_942822    | <b>LOC646626</b>  | hypothetical LOC646626                                                         | 2,865 |
| NM_013370    | <b>OSGIN1</b>     | oxidative stress induced growth inhibitor 1                                    | 2,857 |
| NM_002632    | <b>PGF</b>        | placental growth factor                                                        | 2,855 |
| NM_025090    | <b>USP36</b>      | ubiquitin specific peptidase 36                                                | 2,855 |
| NM_198261    | <b>RSRC2</b>      | arginine/serine-rich coiled-coil 2                                             | 2,850 |
| AY513723     | <b>NCRNA00275</b> | non-protein coding RNA 275                                                     | 2,847 |
| NM_024512    | <b>LRRC2</b>      | leucine rich repeat containing 2                                               | 2,846 |
| NM_152758    | <b>YTHDF3</b>     | YTH domain family, member 3                                                    | 2,818 |
| NM_153607    | <b>C5ORF41</b>    | chromosome 5 open reading frame 41                                             | 2,814 |
| NM_005104    | <b>BRD2</b>       | bromodomain containing 2                                                       | 2,810 |
| NM_001945    | <b>HBEGF</b>      | heparin-binding EGF-like growth factor                                         | 2,810 |
| NM_006096    | <b>NDRG1</b>      | N-myc downstream regulated 1                                                   | 2,808 |
| NM_018700    | <b>TRIM36</b>     | tripartite motif-containing 36                                                 | 2,800 |
| NM_022818    | <b>MAP1LC3B</b>   | microtubule-associated protein 1 light chain 3 beta                            | 2,780 |
| NM_003463    | <b>PTP4A1</b>     | protein tyrosine phosphatase type IVA, member 1                                | 2,780 |
| NM_005524    | <b>HES1</b>       | hairy and enhancer of split 1, (Drosophila)                                    | 2,760 |
| NM_182527    | <b>CABP7</b>      | calcium binding protein 7                                                      | 2,752 |
| NM_021979    | <b>HSPA2</b>      | heat shock 70kDa protein 2                                                     | 2,743 |
| NM_000399    | <b>EGR2</b>       | early growth response 2                                                        | 2,742 |

|              |                  |                                                                    |       |
|--------------|------------------|--------------------------------------------------------------------|-------|
| NM_002341    | <b>LTB</b>       | lymphotoxin beta (TNF superfamily, member 3)                       | 2,739 |
| NM_014423    | <b>AFF4</b>      | AF4/FMR2 family, member 4                                          | 2,724 |
| NM_001353    | <b>AKR1C1</b>    | aldo-keto reductase family 1, member C1                            | 2,690 |
| NM_000364    | <b>TNNT2</b>     | troponin T type 2 (cardiac)                                        | 2,682 |
| NM_021065    | <b>HIST1H2AD</b> | histone cluster 1, H2ad                                            | 2,680 |
| NM_000361    | <b>THBD</b>      | thrombomodulin                                                     | 2,674 |
| NM_001657    | <b>AREG</b>      | amphiregulin                                                       | 2,672 |
| NM_014504    | <b>RABGEF1</b>   | RAB guanine nucleotide exchange factor (GEF) 1                     | 2,670 |
| NM_016530    | <b>RAB8B</b>     | RAB8B, member RAS oncogene family                                  | 2,658 |
| NM_012234    | <b>RYBP</b>      | RING1 and YY1 binding protein                                      | 2,640 |
| NM_021958    | <b>HLX</b>       | H2.0-like homeobox                                                 | 2,618 |
| NM_006260    | <b>DNAJC3</b>    | DnaJ (Hsp40) homolog, subfamily C, member 3                        | 2,614 |
| NM_025054    | <b>VCPIP1</b>    | valosin containing protein (p97)/p47 complex interacting protein 1 | 2,614 |
| NM_021960    | <b>MCL1</b>      | myeloid cell leukemia sequence 1 (BCL2-related)                    | 2,606 |
| NM_001547    | <b>IFIT2</b>     | interferon-induced protein with tetratricopeptide repeats 2        | 2,600 |
| NM_002089    | <b>CXCL2</b>     | chemokine (C-X-C motif) ligand 2                                   | 2,597 |
| NM_005527    | <b>HSPA1L</b>    | heat shock 70kDa protein 1-like                                    | 2,595 |
| NM_001967    | <b>EIF4A2</b>    | eukaryotic translation initiation factor 4A2                       | 2,590 |
| NM_007207    | <b>DUSP10</b>    | dual specificity phosphatase 10                                    | 2,580 |
| NM_004521    | <b>KIF5B</b>     | kinesin family member 5B                                           | 2,579 |
| NM_002514    | <b>NOV</b>       | nephroblastoma overexpressed gene                                  | 2,570 |
| NM_014650    | <b>ZNF432</b>    | zinc finger protein 432                                            | 2,561 |
| NM_021052    | <b>HIST1H2AE</b> | histone cluster 1, H2ae                                            | 2,554 |
| NM_173198    | <b>NR4A3</b>     | nuclear receptor subfamily 4, group A, member 3                    | 2,551 |
| NM_001356    | <b>DDX3X</b>     | DEAD (Asp-Glu-Ala-Asp) box polypeptide 3, X-linked                 | 2,550 |
| NM_033027    | <b>CSRNP1</b>    | cysteine-serine-rich nuclear protein 1                             | 2,548 |
| NM_001172    | <b>ARG2</b>      | arginase, type II                                                  | 2,546 |
| NM_032717    | <b>AGPAT9</b>    | 1-acylglycerol-3-phosphate O-acyltransferase 9                     | 2,541 |
| NM_018064    | <b>AKIRIN2</b>   | akirin 2                                                           | 2,540 |
| NM_001955    | <b>EDN1</b>      | endothelin 1                                                       | 2,540 |
| BC007524     | <b>SPAG9</b>     | sperm associated antigen 9                                         | 2,537 |
| AB065089     | <b>RPS2</b>      | ribosomal protein S2                                               | 2,536 |
| NM_004281    | <b>BAG3</b>      | BCL2-associated athanogene 3                                       | 2,530 |
| NM_001007245 | <b>IFRD1</b>     | interferon-related developmental regulator 1                       | 2,530 |
| NM_020307    | <b>CCNL1</b>     | cyclin L1                                                          | 2,520 |

|              |                  |                                                                                                     |              |
|--------------|------------------|-----------------------------------------------------------------------------------------------------|--------------|
| BC063383     | <b>LOC400573</b> | hypothetical LOC400573                                                                              | <b>2,516</b> |
| BC022205     | <b>SNHG12</b>    | small nucleolar RNA host gene 12 (non-protein coding)                                               | <b>2,512</b> |
| NM_001012971 | <b>C20ORF106</b> | chromosome 20 open reading frame 106                                                                | <b>2,507</b> |
| NM_020857    | <b>VPS18</b>     | vacuolar protein sorting 18 homolog (S. cerevisiae)                                                 | <b>2,501</b> |
| NM_022780    | <b>RMND5A</b>    | required for meiotic nuclear division 5 homolog A (S. cerevisiae)                                   | <b>2,500</b> |
| NM_005204    | <b>MAP3K8</b>    | mitogen-activated protein kinase kinase kinase 8                                                    | <b>2,498</b> |
| NM_023940    | <b>RASL11B</b>   | RAS-like, family 11, member B                                                                       | <b>2,494</b> |
| NM_024116    | <b>TAF1D</b>     | TATA box binding protein (TBP)-associated factor, RNA polymerase I, D, 41kDa                        | <b>2,492</b> |
| NM_014220    | <b>TM4SF1</b>    | transmembrane 4 L six family member 1                                                               | <b>2,491</b> |
| NM_002539    | <b>ODC1</b>      | ornithine decarboxylase 1                                                                           | <b>2,489</b> |
| NM_002192    | <b>INHBA</b>     | inhibin, beta A                                                                                     | <b>2,473</b> |
| NM_003407    | <b>ZFP36</b>     | zinc finger protein 36, C3H type, homolog (mouse)                                                   | <b>2,472</b> |
| NM_016449    | <b>C22ORF43</b>  | chromosome 22 open reading frame 43                                                                 | <b>2,472</b> |
| NM_006988    | <b>ADAMTS1</b>   | ADAM metalloproteinase with thrombospondin type 1 motif, 1                                          | <b>2,470</b> |
| NM_002229    | <b>JUNB</b>      | jun B proto-oncogene                                                                                | <b>2,470</b> |
| NM_003842    | <b>TNFRSF10B</b> | tumor necrosis factor receptor superfamily, member 10b                                              | <b>2,467</b> |
| NM_030627    | <b>CPEB4</b>     | cytoplasmic polyadenylation element binding protein 4                                               | <b>2,460</b> |
| NM_001730    | <b>KLF5</b>      | Kruppel-like factor 5 (intestinal)                                                                  | <b>2,460</b> |
| NM_199188    | <b>LARP4</b>     | La ribonucleoprotein domain family, member 4                                                        | <b>2,460</b> |
| NM_013453    | <b>SPANXA1</b>   | sperm protein associated with the nucleus, X-linked, family member A1                               | <b>2,460</b> |
| NM_000641    | <b>IL11</b>      | interleukin 11                                                                                      | <b>2,457</b> |
| NM_021237    | <b>SELK</b>      | selenoprotein K                                                                                     | <b>2,457</b> |
| NM_032199    | <b>ARID5B</b>    | AT rich interactive domain 5B (MRF1-like)                                                           | <b>2,450</b> |
| NM_021963    | <b>NAP1L2</b>    | nucleosome assembly protein 1-like 2                                                                | <b>2,436</b> |
| NM_003411    | <b>ZFY</b>       | zinc finger protein, Y-linked                                                                       | <b>2,435</b> |
| NM_012204    | <b>GTF3C4</b>    | general transcription factor IIIC, polypeptide 4, 90kDa                                             | <b>2,434</b> |
| NM_004235    | <b>KLF4</b>      | Kruppel-like factor 4 (gut)                                                                         | <b>2,433</b> |
| NM_005570    | <b>LMAN1</b>     | lectin, mannose-binding, 1                                                                          | <b>2,431</b> |
| NM_183013    | <b>CREM</b>      | cAMP responsive element modulator                                                                   | <b>2,430</b> |
| NM_003597    | <b>KLF11</b>     | Kruppel-like factor 11                                                                              | <b>2,420</b> |
| NM_020435    | <b>GJC2</b>      | gap junction protein, gamma 2, 47kDa                                                                | <b>2,418</b> |
| NM_134260    | <b>RORA</b>      | RAR-related orphan receptor A                                                                       | <b>2,413</b> |
| NM_206907    | <b>PRKAA1</b>    | protein kinase, AMP-activated, alpha 1 catalytic subunit                                            | <b>2,410</b> |
| NM_006072    | <b>CCL26</b>     | chemokine (C-C motif) ligand 26                                                                     | <b>2,410</b> |
| NM_001235    | <b>SERPINH1</b>  | serpin peptidase inhibitor, clade H (heat shock protein 47), member 1, (collagen binding protein 1) | <b>2,409</b> |

|           |                  |                                                            |       |
|-----------|------------------|------------------------------------------------------------|-------|
| NM_053067 | <b>UBQLN1</b>    | ubiquilin 1                                                | 2,400 |
| NM_001621 | <b>AHR</b>       | aryl hydrocarbon receptor                                  | 2,398 |
| NM_006718 | <b>PLAGL1</b>    | pleiomorphic adenoma gene-like 1                           | 2,395 |
| NM_022117 | <b>TSPYL2</b>    | TSPY-like 2                                                | 2,394 |
| NM_019116 | <b>UBFD1</b>     | ubiquitin family domain containing 1                       | 2,390 |
| AK002097  | <b>FLJ11235</b>  | hypothetical FLJ11235                                      | 2,390 |
| NM_139160 | <b>DEPDC7</b>    | DEP domain containing 7                                    | 2,388 |
| NM_018948 | <b>ERRFI1</b>    | ERBB receptor feedback inhibitor 1                         | 2,388 |
| NM_033514 | <b>LIMS3</b>     | LIM and senescent cell antigen-like domains 3              | 2,387 |
| NM_015428 | <b>ZNF473</b>    | zinc finger protein 473                                    | 2,383 |
| NM_025040 | <b>ZNF614</b>    | zinc finger protein 614                                    | 2,381 |
| NM_020354 | <b>ENTPD7</b>    | ectonucleoside triphosphate diphosphohydrolase 7           | 2,380 |
| NM_002268 | <b>KPNA4</b>     | karyopherin alpha 4 (importin alpha 3)                     | 2,380 |
| BC036699  | <b>LOC654433</b> | hypothetical LOC654433                                     | 2,372 |
| NM_005126 | <b>NR1D2</b>     | nuclear receptor subfamily 1, group D, member 2            | 2,362 |
| NM_032895 | <b>C17ORF91</b>  | chromosome 17 open reading frame 91                        | 2,357 |
| NM_001100 | <b>ACTA1</b>     | actin, alpha 1, skeletal muscle                            | 2,355 |
| NM_000640 | <b>IL13RA2</b>   | interleukin 13 receptor, alpha 2                           | 2,352 |
| NM_005066 | <b>SFPQ</b>      | splicing factor proline/glutamine-rich                     | 2,350 |
| NM_003359 | <b>UGDH</b>      | UDP-glucose 6-dehydrogenase                                | 2,340 |
| NM_003338 | <b>UBE2D1</b>    | ubiquitin-conjugating enzyme E2D 1 (UBC4/5 homolog, yeast) | 2,338 |
| NM_014931 | <b>PPP6R1</b>    | protein phosphatase 6, regulatory subunit 1                | 2,333 |
| NM_020651 | <b>PELI1</b>     | pellino homolog 1 (Drosophila)                             | 2,331 |
| NM_173354 | <b>SIK1</b>      | salt-inducible kinase 1                                    | 2,330 |
| NM_175065 | <b>HIST2H2AB</b> | histone cluster 2, H2ab                                    | 2,326 |
| NM_170744 | <b>UNC5B</b>     | unc-5 homolog B (C. elegans)                               | 2,324 |
| BC038983  | <b>USP36</b>     | ubiquitin specific peptidase 36                            | 2,322 |
| NM_021217 | <b>ZNF77</b>     | zinc finger protein 77                                     | 2,318 |
| NM_006644 | <b>HSPH1</b>     | heat shock 105kDa/110kDa protein 1                         | 2,315 |
| NM_012325 | <b>MAPRE1</b>    | microtubule-associated protein, RP/EB family, member 1     | 2,314 |
| NM_002448 | <b>MSX1</b>      | msh homeobox 1                                             | 2,311 |
| NM_006033 | <b>LIPG</b>      | lipase, endothelial                                        | 2,311 |
| NM_004831 | <b>MED26</b>     | mediator complex subunit 26                                | 2,305 |
| NM_007039 | <b>PTPN21</b>    | protein tyrosine phosphatase, non-receptor type 21         | 2,304 |
| NM_001321 | <b>CSRP2</b>     | cysteine and glycine-rich protein 2                        | 2,304 |



|           |                 |                                                                   |       |
|-----------|-----------------|-------------------------------------------------------------------|-------|
| NM_003533 | <b>HIST1H3I</b> | histone cluster 1, H3i                                            | 2,302 |
| NM_003745 | <b>SOCS1</b>    | suppressor of cytokine signaling 1                                | 2,300 |
| NM_004093 | <b>EFNB2</b>    | ephrin-B2                                                         | 2,299 |
| NM_022041 | <b>GAN</b>      | gigaxonin                                                         | 2,297 |
| NM_032145 | <b>FBXO30</b>   | F-box protein 30                                                  | 2,295 |
| NM_015394 | <b>ZNF10</b>    | zinc finger protein 10                                            | 2,293 |
| AK090405  | <b>KDM4B</b>    | lysine (K)-specific demethylase 4B                                | 2,291 |
| NM_015723 | <b>PNPLA8</b>   | patatin-like phospholipase domain containing 8                    | 2,290 |
| NM_003655 | <b>CBX4</b>     | chromobox homolog 4                                               | 2,289 |
| AI570240  | <b>ERRFI1</b>   | ERBB receptor feedback inhibitor 1                                | 2,289 |
| NM_002041 | <b>GABPB1</b>   | GA binding protein transcription factor, beta subunit 1           | 2,283 |
| NM_004241 | <b>JMJD1C</b>   | jumonji domain containing 1C                                      | 2,280 |
| NM_017798 | <b>YTHDF1</b>   | YTH domain family, member 1                                       | 2,278 |
| NM_004040 | <b>RHOB</b>     | ras homolog gene family, member B                                 | 2,276 |
| AK023803  | <b>ARF1</b>     | ADP-ribosylation factor 1                                         | 2,276 |
| NM_025209 | <b>EPC1</b>     | enhancer of polycomb homolog 1 (Drosophila)                       | 2,270 |
| NM_014587 | <b>SOX8</b>     | SRY (sex determining region Y)-box 8                              | 2,265 |
| NM_018445 | <b>SELS</b>     | selenoprotein S                                                   | 2,264 |
| NM_006086 | <b>TUBB3</b>    | tubulin, beta 3                                                   | 2,260 |
| NM_015247 | <b>CYLD</b>     | cyliindromatosis (turban tumor syndrome)                          | 2,246 |
| NM_198077 | <b>C1ORF52</b>  | chromosome 1 open reading frame 52                                | 2,241 |
| NM_007350 | <b>PHLDA1</b>   | pleckstrin homology-like domain, family A, member 1               | 2,240 |
| NM_018169 | <b>C12ORF35</b> | chromosome 12 open reading frame 35                               | 2,239 |
| NM_145254 | <b>TMEM170A</b> | transmembrane protein 170A                                        | 2,237 |
| NM_032596 | <b>C9ORF24</b>  | chromosome 9 open reading frame 24                                | 2,231 |
| NM_019891 | <b>ERO1LB</b>   | ERO1-like beta (S. cerevisiae)                                    | 2,230 |
| NM_000214 | <b>JAG1</b>     | jagged 1                                                          | 2,227 |
| NM_006322 | <b>TUBGCP3</b>  | tubulin, gamma complex associated protein 3                       | 2,225 |
| NM_152699 | <b>SENP5</b>    | SUMO1/sentrin specific peptidase 5                                | 2,222 |
| NR_002307 | <b>MSX2P</b>    | msh homeobox 2 pseudogene 1                                       | 2,222 |
| AK090585  | <b>SNHG7</b>    | small nucleolar RNA host gene 7 (non-protein coding)              | 2,220 |
| NM_019600 | <b>KIAA1370</b> | KIAA1370                                                          | 2,220 |
| AI652920  | <b>BAMBI</b>    | BMP and activin membrane-bound inhibitor homolog (Xenopus laevis) | 2,216 |
| NM_004864 | <b>GDF15</b>    | growth differentiation factor 15                                  | 2,214 |
| NM_025106 | <b>SPSB1</b>    | splA/ryanodine receptor domain and SOCS box containing 1          | 2,210 |

|              |                  |                                                                                                     |              |
|--------------|------------------|-----------------------------------------------------------------------------------------------------|--------------|
| NM_002641    | <b>PIGA</b>      | phosphatidylinositol glycan anchor biosynthesis, class A                                            | <b>2,209</b> |
| S72869       | <b>CCDC6</b>     | coiled-coil domain containing 6                                                                     | <b>2,209</b> |
| NM_152829    | <b>TES</b>       | testis derived transcript (3 LIM domains)                                                           | <b>2,205</b> |
| NM_175839    | <b>SMOX</b>      | spermine oxidase                                                                                    | <b>2,202</b> |
| NM_001002233 | <b>RAB11FIP1</b> | RAB11 family interacting protein 1 (class I)                                                        | <b>2,199</b> |
| NM_003629    | <b>PIK3R3</b>    | phosphoinositide-3-kinase, regulatory subunit 3 (gamma)                                             | <b>2,196</b> |
| NM_024700    | <b>SNIP1</b>     | Smad nuclear interacting protein 1                                                                  | <b>2,192</b> |
| NM_138800    | <b>TRIM43</b>    | tripartite motif-containing 43                                                                      | <b>2,191</b> |
| NM_016006    | <b>ABHD5</b>     | abhydrolase domain containing 5                                                                     | <b>2,188</b> |
| NM_206866    | <b>BACH1</b>     | BTB and CNC homology 1, basic leucine zipper transcription factor 1                                 | <b>2,186</b> |
| NM_003537    | <b>HIST1H3B</b>  | histone cluster 1, H3b                                                                              | <b>2,183</b> |
| NM_006832    | <b>FERMT2</b>    | fermitin family member 2                                                                            | <b>2,181</b> |
| NM_000574    | <b>CD55</b>      | CD55 molecule, decay accelerating factor for complement (Cromer blood group)                        | <b>2,180</b> |
| NM_005345    | <b>HSPA1A</b>    | heat shock 70kDa protein 1A                                                                         | <b>2,180</b> |
| NM_016120    | <b>RLIM</b>      | ring finger protein, LIM domain interacting                                                         | <b>2,180</b> |
| NM_015046    | <b>SETX</b>      | senataxin                                                                                           | <b>2,180</b> |
| NM_005994    | <b>TBX2</b>      | T-box 2                                                                                             | <b>2,179</b> |
| NM_144606    | <b>FLCN</b>      | folliculin                                                                                          | <b>2,174</b> |
| NM_004582    | <b>RABGGTB</b>   | Rab geranylgeranyltransferase, beta subunit                                                         | <b>2,170</b> |
| NM_032829    | <b>C12ORF34</b>  | chromosome 12 open reading frame 34                                                                 | <b>2,167</b> |
| NM_022826    | <b>MARCH7</b>    | membrane-associated ring finger (C3HC4) 7                                                           | <b>2,161</b> |
| NM_024708    | <b>ASB7</b>      | ankyrin repeat and SOCS box-containing 7                                                            | <b>2,160</b> |
| NM_007034    | <b>DNAJB4</b>    | DnaJ (Hsp40) homolog, subfamily B, member 4                                                         | <b>2,160</b> |
| NM_005749    | <b>TOB1</b>      | transducer of ERBB2, 1                                                                              | <b>2,158</b> |
| NM_006912    | <b>RIT1</b>      | Ras-like without CAAX 1                                                                             | <b>2,157</b> |
| BG980953     | <b>SERPINH1</b>  | serpin peptidase inhibitor, clade H (heat shock protein 47), member 1, (collagen binding protein 1) | <b>2,154</b> |
| NM_004947    | <b>DOCK3</b>     | dedicator of cytokinesis 3                                                                          | <b>2,154</b> |
| NM_017447    | <b>C21ORF91</b>  | chromosome 21 open reading frame 91                                                                 | <b>2,150</b> |
| NM_194285    | <b>SPTY2D1</b>   | SPT2, Suppressor of Ty, domain containing 1 ( <i>S. cerevisiae</i> )                                | <b>2,149</b> |
| NM_138459    | <b>NUS1</b>      | nuclear undecaprenyl pyrophosphate synthase 1 homolog ( <i>S. cerevisiae</i> )                      | <b>2,146</b> |
| BU731317     | <b>HSPA8</b>     | heat shock 70kDa protein 8                                                                          | <b>2,146</b> |
| NM_006504    | <b>PTPRE</b>     | protein tyrosine phosphatase, receptor type, E                                                      | <b>2,145</b> |
| NM_018143    | <b>KLHL11</b>    | kelch-like 11 ( <i>Drosophila</i> )                                                                 | <b>2,144</b> |
| NM_001032281 | <b>TFPI</b>      | tissue factor pathway inhibitor (lipoprotein-associated coagulation inhibitor)                      | <b>2,144</b> |
| NM_015092    | <b>SMG1</b>      | SMG1 homolog, phosphatidylinositol 3-kinase-related kinase ( <i>C. elegans</i> )                    | <b>2,144</b> |

|              |                 |                                                                        |       |
|--------------|-----------------|------------------------------------------------------------------------|-------|
| NM_005238    | <b>ETS1</b>     | v-ets erythroblastosis virus E26 oncogene homolog 1 (avian)            | 2,142 |
| NM_003622    | <b>PPFIBP1</b>  | PTPRF interacting protein, binding protein 1 (liprin beta 1)           | 2,141 |
| NM_015683    | <b>ARRDC2</b>   | arrestin domain containing 2                                           | 2,140 |
| NM_006007    | <b>ZFAND5</b>   | zinc finger, AN1-type domain 5                                         | 2,140 |
| NM_017633    | <b>FAM46A</b>   | family with sequence similarity 46, member A                           | 2,139 |
| NM_004420    | <b>DUSP8</b>    | dual specificity phosphatase 8                                         | 2,139 |
| NM_012421    | <b>RLF</b>      | rearranged L-myc fusion                                                | 2,138 |
| NM_005156    | <b>ROD1</b>     | ROD1 regulator of differentiation 1 (S. pombe)                         | 2,137 |
| CR622681     | <b>FLJ43663</b> | hypothetical LOC378805                                                 | 2,137 |
| NM_007076    | <b>FICD</b>     | FIC domain containing                                                  | 2,137 |
| NM_006186    | <b>NR4A2</b>    | nuclear receptor subfamily 4, group A, member 2                        | 2,132 |
| NM_012238    | <b>SIRT1</b>    | sirtuin 1                                                              | 2,130 |
| NM_001005464 | <b>HIST2H3A</b> | histone cluster 2, H3a                                                 | 2,130 |
| NM_015277    | <b>NEDD4L</b>   | neural precursor cell expressed, developmentally down-regulated 4-like | 2,130 |
| NM_006241    | <b>PPP1R2</b>   | protein phosphatase 1, regulatory (inhibitor) subunit 2                | 2,130 |
| NM_006425    | <b>SLU7</b>     | SLU7 splicing factor homolog (S. cerevisiae)                           | 2,128 |
| NM_015161    | <b>ARL6IP1</b>  | ADP-ribosylation factor-like 6 interacting protein 1                   | 2,128 |
| NM_012110    | <b>CHIC2</b>    | cysteine-rich hydrophobic domain 2                                     | 2,127 |
| NM_133496    | <b>SLC30A7</b>  | solute carrier family 30 (zinc transporter), member 7                  | 2,126 |
| NM_000958    | <b>PTGER4</b>   | prostaglandin E receptor 4 (subtype EP4)                               | 2,125 |
| NM_014997    | <b>KLHDC10</b>  | kelch domain containing 10                                             | 2,125 |
| NM_004405    | <b>DLX2</b>     | distal-less homeobox 2                                                 | 2,123 |
| NM_181453    | <b>GCC2</b>     | GRIP and coiled-coil domain containing 2                               | 2,120 |
| NM_005054    | <b>RGPD5</b>    | RANBP2-like and GRIP domain containing 5                               | 2,117 |
| NM_152718    | <b>VWCE</b>     | von Willebrand factor C and EGF domains                                | 2,113 |
| NM_015866    | <b>PRDM2</b>    | PR domain containing 2, with ZNF domain                                | 2,111 |
| NM_033083    | <b>EAF1</b>     | ELL associated factor 1                                                | 2,110 |
| NM_004429    | <b>EFNB1</b>    | ephrin-B1                                                              | 2,110 |
| NM_020801    | <b>ARRDC3</b>   | arrestin domain containing 3                                           | 2,109 |
| BC000527     | <b>EWSR1</b>    | Ewing sarcoma breakpoint region 1                                      | 2,103 |
| NM_012257    | <b>HBP1</b>     | HMG-box transcription factor 1                                         | 2,099 |
| NM_014395    | <b>DAPP1</b>    | dual adaptor of phosphotyrosine and 3-phosphoinositides                | 2,098 |
| NM_017548    | <b>CDV3</b>     | CDV3 homolog (mouse)                                                   | 2,098 |
| NM_001008394 | <b>EID3</b>     | EP300 interacting inhibitor of differentiation 3                       | 2,097 |
| NM_032417    | <b>SPANXD</b>   | SPANX family, member D                                                 | 2,094 |

|              |                 |                                                                |       |
|--------------|-----------------|----------------------------------------------------------------|-------|
| NM_152342    | <b>CDYL2</b>    | chromodomain protein, Y-like 2                                 | 2,094 |
| NM_016040    | <b>TMED5</b>    | transmembrane emp24 protein transport domain containing 5      | 2,093 |
| NM_003534    | <b>HIST1H3G</b> | histone cluster 1, H3g                                         | 2,091 |
| NM_000331    | <b>SAA1</b>     | serum amyloid A1                                               | 2,091 |
| NM_032793    | <b>MFSD2A</b>   | major facilitator superfamily domain containing 2A             | 2,088 |
| NM_001011713 | <b>NAA30</b>    | N(alpha)-acetyltransferase 30, NatC catalytic subunit          | 2,085 |
| NM_020933    | <b>ZNF317</b>   | zinc finger protein 317                                        | 2,083 |
| NM_173582    | <b>PGM2L1</b>   | phosphoglucomutase 2-like 1                                    | 2,081 |
| NM_020119    | <b>ZC3HAV1</b>  | zinc finger CCCH-type, antiviral 1                             | 2,080 |
| NM_015368    | <b>PANX1</b>    | pannexin 1                                                     | 2,080 |
| NM_032228    | <b>FAR1</b>     | fatty acyl CoA reductase 1                                     | 2,080 |
| NM_002852    | <b>PTX3</b>     | pentraxin 3, long                                              | 2,080 |
| NM_018456    | <b>EAF2</b>     | ELL associated factor 2                                        | 2,079 |
| NM_006577    | <b>B3GNT2</b>   | UDP-GlcNAc:betaGal beta-1,3-N-acetylglucosaminyltransferase 2  | 2,079 |
| NM_001040440 | <b>CCDC112</b>  | coiled-coil domain containing 112                              | 2,078 |
| X90978       | <b>RUNX1</b>    | runt-related transcription factor 1                            | 2,075 |
| NM_002184    | <b>IL6ST</b>    | interleukin 6 signal transducer (gp130, oncostatin M receptor) | 2,074 |
| NM_006509    | <b>RELB</b>     | v-rel reticuloendotheliosis viral oncogene homolog B           | 2,073 |
| NM_014999    | <b>RAB21</b>    | RAB21, member RAS oncogene family                              | 2,073 |
| NM_144653    | <b>NACC2</b>    | NACC family member 2, BEN and BTB (POZ) domain containing      | 2,068 |
| NM_017709    | <b>FAM46C</b>   | family with sequence similarity 46, member C                   | 2,067 |
| NM_002090    | <b>CXCL3</b>    | chemokine (C-X-C motif) ligand 3                               | 2,067 |
| NM_013360    | <b>ZNF222</b>   | zinc finger protein 222                                        | 2,065 |
| AK125902     | <b>QSER1</b>    | glutamine and serine rich 1                                    | 2,059 |
| NM_016379    | <b>VCX3A</b>    | variable charge, X-linked 3A                                   | 2,059 |
| NM_002061    | <b>GCLM</b>     | glutamate-cysteine ligase, modifier subunit                    | 2,056 |
| NM_013452    | <b>VCX</b>      | variable charge, X-linked                                      | 2,056 |
| NM_003531    | <b>HIST1H3C</b> | histone cluster 1, H3c                                         | 2,054 |
| NM_016378    | <b>VCX2</b>     | variable charge, X-linked 2                                    | 2,053 |
| NM_004926    | <b>ZFP36L1</b>  | zinc finger protein 36, C3H type-like 1                        | 2,049 |
| BC011923     | <b>RBM33</b>    | RNA binding motif protein 33                                   | 2,049 |
| NM_015878    | <b>AZIN1</b>    | antizyme inhibitor 1                                           | 2,044 |
| NR_003098    | <b>SNHG1</b>    | small nucleolar RNA host gene 1 (non-protein coding)           | 2,042 |
| NM_020414    | <b>DDX24</b>    | DEAD (Asp-Glu-Ala-Asp) box polypeptide 24                      | 2,040 |
| NM_178815    | <b>ARL5B</b>    | ADP-ribosylation factor-like 5B                                | 2,040 |

|              |                  |                                                                        |       |
|--------------|------------------|------------------------------------------------------------------------|-------|
| NM_021599    | <b>ADAMTS2</b>   | ADAM metallopeptidase with thrombospondin type 1 motif, 2              | 2,040 |
| NM_002065    | <b>GLUL</b>      | glutamate-ammonia ligase                                               | 2,039 |
| NM_138771    | <b>CCDC126</b>   | coiled-coil domain containing 126                                      | 2,038 |
| NM_002167    | <b>ID3</b>       | inhibitor of DNA binding 3, dominant negative helix-loop-helix protein | 2,038 |
| NM_001197    | <b>BIK</b>       | BCL2-interacting killer (apoptosis-inducing)                           | 2,038 |
| NM_006275    | <b>SRSF6</b>     | serine/arginine-rich splicing factor 6                                 | 2,036 |
| NM_032505    | <b>KBTBD8</b>    | kelch repeat and BTB (POZ) domain containing 8                         | 2,036 |
| NM_005078    | <b>TLE3</b>      | transducin-like enhancer of split 3 (E(sp1) homolog, Drosophila)       | 2,036 |
| NM_182580    | <b>CYB561D1</b>  | cytochrome b-561 domain containing 1                                   | 2,034 |
| NM_203411    | <b>TMEM88</b>    | transmembrane protein 88                                               | 2,032 |
| NM_003290    | <b>TPM4</b>      | tropomyosin 4                                                          | 2,030 |
| NM_018047    | <b>RBM22</b>     | RNA binding motif protein 22                                           | 2,030 |
| NM_007355    | <b>HSP90AB1</b>  | heat shock protein 90kDa alpha (cytosolic), class B member 1           | 2,027 |
| NM_015633    | <b>FGFR1OP2</b>  | FGFR1 oncogene partner 2                                               | 2,026 |
| NM_032315    | <b>SLC25A33</b>  | solute carrier family 25, member 33                                    | 2,026 |
| NM_003799    | <b>RNMT</b>      | RNA (guanine-7-) methyltransferase                                     | 2,022 |
| NM_003921    | <b>BCL10</b>     | B-cell CLL/lymphoma 10                                                 | 2,022 |
| NM_020390    | <b>EIF5A2</b>    | eukaryotic translation initiation factor 5A2                           | 2,021 |
| NM_001025366 | <b>VEGFA</b>     | vascular endothelial growth factor A                                   | 2,020 |
| NM_016605    | <b>FAM53C</b>    | family with sequence similarity 53, member C                           | 2,020 |
| NM_144975    | <b>SLFN5</b>     | schlafen family member 5                                               | 2,018 |
| NM_058241    | <b>CCNT2</b>     | cyclin T2                                                              | 2,018 |
| NM_024018    | <b>BTN2A3</b>    | butyrophilin, subfamily 2, member A3                                   | 2,018 |
| BF475893     | <b>TRIB1</b>     | tribbles homolog 1 (Drosophila)                                        | 2,015 |
| NM_014701    | <b>SECISBP2L</b> | SECIS binding protein 2-like                                           | 2,013 |
| NM_005470    | <b>ABI1</b>      | abl-interactor 1                                                       | 2,010 |
| NM_003543    | <b>HIST1H4H</b>  | histone cluster 1, H4h                                                 | 2,009 |
| NM_005335    | <b>HCLS1</b>     | hematopoietic cell-specific Lyn substrate 1                            | 2,008 |
| NM_004907    | <b>IER2</b>      | immediate early response 2                                             | 2,007 |
| NM_001558    | <b>IL10RA</b>    | interleukin 10 receptor, alpha                                         | 2,006 |
| NM_002359    | <b>MAFG</b>      | v-maf musculoaponeurotic fibrosarcoma oncogene homolog G (avian)       | 2,005 |
| NM_021968    | <b>HIST1H4J</b>  | histone cluster 1, H4j                                                 | 2,004 |
| NM_020755    | <b>SERINC1</b>   | serine incorporator 1                                                  | 2,004 |
| NM_058229    | <b>FBXO32</b>    | F-box protein 32                                                       | 2,002 |
| NM_021945    | <b>SLC22A23</b>  | solute carrier family 22, member 23                                    | 2,001 |

|           |                 |                                                                                     |        |
|-----------|-----------------|-------------------------------------------------------------------------------------|--------|
| NM_005266 | <b>GJA5</b>     | gap junction protein, alpha 5, 40kDa                                                | -2,002 |
| NM_002764 | <b>PRPS1</b>    | phosphoribosyl pyrophosphate synthetase 1                                           | -2,003 |
| NM_182513 | <b>SPC24</b>    | SPC24, NDC80 kinetochore complex component, homolog (S. cerevisiae)                 | -2,005 |
| NM_021824 | <b>NIF3L1</b>   | NIF3 NGG1 interacting factor 3-like 1 (S. pombe)                                    | -2,008 |
| NM_020190 | <b>OLFML3</b>   | olfactomedin-like 3                                                                 | -2,012 |
| NM_032015 | <b>RNF26</b>    | ring finger protein 26                                                              | -2,014 |
| NM_032637 | <b>SKP2</b>     | S-phase kinase-associated protein 2 (p45)                                           | -2,017 |
| NM_021643 | <b>TRIB2</b>    | tribbles homolog 2 (Drosophila)                                                     | -2,019 |
| CR594281  | <b>METTL3</b>   | methyltransferase like 3                                                            | -2,024 |
| NM_005502 | <b>ABCA1</b>    | ATP-binding cassette, sub-family A (ABC1), member 1                                 | -2,025 |
| NM_032831 | <b>ORAI2</b>    | ORAI calcium release-activated calcium modulator 2                                  | -2,029 |
| NM_005374 | <b>MPP2</b>     | membrane protein, palmitoylated 2 (MAGUK p55 subfamily member 2)                    | -2,036 |
| NM_002034 | <b>FUT5</b>     | fucosyltransferase 5 (alpha (1,3) fucosyltransferase)                               | -2,037 |
| NM_003119 | <b>SPG7</b>     | spastic paraplegia 7 (pure and complicated autosomal recessive)                     | -2,040 |
| NM_006455 | <b>LEPREL4</b>  | leprecan-like 4                                                                     | -2,041 |
| NM_005576 | <b>LOXL1</b>    | lysyl oxidase-like 1                                                                | -2,046 |
| NM_198580 | <b>SLC27A1</b>  | solute carrier family 27 (fatty acid transporter), member 1                         | -2,048 |
| NM_000481 | <b>AMT</b>      | aminomethyltransferase                                                              | -2,048 |
| NM_152308 | <b>C16ORF75</b> | chromosome 16 open reading frame 75                                                 | -2,050 |
| NM_005951 | <b>MT1H</b>     | metallothionein 1H                                                                  | -2,050 |
| NM_022167 | <b>XYLT2</b>    | xylosyltransferase II                                                               | -2,057 |
| BC004287  | <b>ZNF704</b>   | zinc finger protein 704                                                             | -2,061 |
| NM_021137 | <b>TNFAIP1</b>  | tumor necrosis factor, alpha-induced protein 1 (endothelial)                        | -2,064 |
| NM_173508 | <b>SLC35F3</b>  | solute carrier family 35, member F3                                                 | -2,064 |
| AF495725  | <b>SLC25A37</b> | solute carrier family 25, member 37                                                 | -2,067 |
| NM_030641 | <b>APOL6</b>    | apolipoprotein L, 6                                                                 | -2,069 |
| NM_006876 | <b>B3GNT1</b>   | UDP-GlcNAc:betaGal beta-1,3-N-acetylglucosaminyltransferase 1                       | -2,073 |
| NM_004990 | <b>MARS</b>     | methionyl-tRNA synthetase                                                           | -2,087 |
| NM_014897 | <b>ZNF652</b>   | zinc finger protein 652                                                             | -2,089 |
| NM_000190 | <b>HMBS</b>     | hydroxymethylbilane synthase                                                        | -2,090 |
| NM_207446 | <b>FAM174B</b>  | family with sequence similarity 174, member B                                       | -2,103 |
| NM_021198 | <b>CTDSP1</b>   | CTD (carboxy-terminal domain, RNA polymerase II, polypeptide A) small phosphatase 1 | -2,107 |
| NM_145294 | <b>WDR90</b>    | WD repeat domain 90                                                                 | -2,119 |
| NR_002791 | <b>EMX2OS</b>   | EMX2 opposite strand (non-protein coding)                                           | -2,121 |
| NM_138375 | <b>CABLES1</b>  | Cdk5 and Abl enzyme substrate 1                                                     | -2,125 |

|              |                    |                                                                                              |        |
|--------------|--------------------|----------------------------------------------------------------------------------------------|--------|
| NM_032854    | <b>CORO6</b>       | coronin 6                                                                                    | -2,127 |
| AK098787     | <b>PLEKHA2</b>     | pleckstrin homology domain containing, family A (phosphoinositide binding specific) member 2 | -2,135 |
| NM_004613    | <b>TGM2</b>        | transglutaminase 2 (C polypeptide, protein-glutamine-gamma-glutamyltransferase)              | -2,140 |
| NM_000930    | <b>PLAT</b>        | plasminogen activator, tissue                                                                | -2,140 |
| NM_017712    | <b>PGPEP1</b>      | pyroglutamyl-peptidase I                                                                     | -2,142 |
| NM_006113    | <b>VAV3</b>        | vav 3 guanine nucleotide exchange factor                                                     | -2,145 |
| AK023606     | <b>ADAMTSL4</b>    | ADAMTS-like 4                                                                                | -2,146 |
| NM_001567    | <b>INPPL1</b>      | inositol polyphosphate phosphatase-like 1                                                    | -2,148 |
| NM_000149    | <b>FUT3</b>        | fucosyltransferase 3 (galactoside 3(4)-L-fucosyltransferase, Lewis blood group)              | -2,159 |
| NM_057161    | <b>KLHDC3</b>      | kelch domain containing 3                                                                    | -2,160 |
| NM_181832    | <b>NF2</b>         | neurofibromin 2 (merlin)                                                                     | -2,163 |
| NM_005952    | <b>MT1X</b>        | metallothionein 1X                                                                           | -2,170 |
| NM_176798    | <b>P2RY6</b>       | pyrimidinergic receptor P2Y, G-protein coupled, 6                                            | -2,178 |
| NM_005325    | <b>HIST1H1A</b>    | histone cluster 1, H1a                                                                       | -2,179 |
| NM_005479    | <b>FRAT1</b>       | frequently rearranged in advanced T-cell lymphomas                                           | -2,179 |
| NM_138370    | <b>PKDCC</b>       | protein kinase domain containing, cytoplasmic homolog (mouse)                                | -2,182 |
| NM_175617    | <b>MT1E</b>        | metallothionein 1E                                                                           | -2,192 |
| NM_005434    | <b>MALL</b>        | mal, T-cell differentiation protein-like                                                     | -2,192 |
| NM_032883    | <b>TOX2</b>        | TOX high mobility group box family member 2                                                  | -2,194 |
| NM_175709    | <b>CBX7</b>        | chromobox homolog 7                                                                          | -2,194 |
| X97261       | <b>MT1L</b>        | metallothionein 1L (gene/pseudogene)                                                         | -2,206 |
|              | <b>LOC10013119</b> |                                                                                              |        |
| AL359605     | <b>9</b>           | transmembrane protein 178-like                                                               | -2,211 |
| NM_018205    | <b>LRRC20</b>      | leucine rich repeat containing 20                                                            | -2,228 |
| NM_002692    | <b>POLE2</b>       | polymerase (DNA directed), epsilon 2 (p59 subunit)                                           | -2,237 |
| NM_138768    | <b>MYEOV</b>       | myeloma overexpressed (in a subset of t(11;14) positive multiple myelomas)                   | -2,241 |
| NM_001874    | <b>CPM</b>         | carboxypeptidase M                                                                           | -2,250 |
| NM_001039651 | <b>C6ORF26</b>     | chromosome 6 open reading frame 26                                                           | -2,254 |
| NM_005322    | <b>HIST1H1B</b>    | histone cluster 1, H1b                                                                       | -2,272 |
| NM_005397    | <b>PODXL</b>       | podocalyxin-like                                                                             | -2,274 |
| NM_005947    | <b>MT1B</b>        | metallothionein 1B                                                                           | -2,304 |
| NM_001001522 | <b>TAGLN</b>       | transgelin                                                                                   | -2,309 |
| NM_000693    | <b>ALDH1A3</b>     | aldehyde dehydrogenase 1 family, member A3                                                   | -2,309 |
| AK056534     | <b>LOC145757</b>   | hypothetical LOC145757                                                                       | -2,314 |

|           |                  |                                                                                     |        |
|-----------|------------------|-------------------------------------------------------------------------------------|--------|
| NM_001067 | <b>TOP2A</b>     | topoisomerase (DNA) II alpha 170kDa                                                 | -2,317 |
| NM_005730 | <b>CTDSP2</b>    | CTD (carboxy-terminal domain, RNA polymerase II, polypeptide A) small phosphatase 2 | -2,323 |
| NM_005950 | <b>MT1G</b>      | metallothionein 1G                                                                  | -2,326 |
| NM_000674 | <b>ADORA1</b>    | adenosine A1 receptor                                                               | -2,359 |
| NM_005071 | <b>SLC1A6</b>    | solute carrier family 1 (high affinity aspartate/glutamate transporter), member 6   | -2,368 |
| NM_015346 | <b>ZFYVE26</b>   | zinc finger, FYVE domain containing 26                                              | -2,370 |
| NM_017637 | <b>BNC2</b>      | basonuclin 2                                                                        | -2,411 |
| NM_000430 | <b>PAFAH1B1</b>  | platelet-activating factor acetylhydrolase 1b, regulatory subunit 1 (45kDa)         | -2,449 |
| NM_018706 | <b>DHTKD1</b>    | dehydrogenase E1 and transketolase domain containing 1                              | -2,522 |
| NM_153840 | <b>GPR110</b>    | G protein-coupled receptor 110                                                      | -2,611 |
| NM_032865 | <b>TNS4</b>      | tensin 4                                                                            | -2,686 |
| AK022110  | <b>GPX8</b>      | glutathione peroxidase 8 (putative)                                                 | -2,695 |
| NM_005566 | <b>LDHA</b>      | lactate dehydrogenase A                                                             | -2,716 |
| AK095678  | <b>LOC151009</b> | hypothetical LOC151009                                                              | -2,745 |
| NM_015035 | <b>ZHX3</b>      | zinc fingers and homeoboxes 3                                                       | -2,818 |
| NM_002318 | <b>LOXL2</b>     | lysyl oxidase-like 2                                                                | -3,160 |



**Table 2. Significantly over-represented biological processes in the whole transcriptome signature of EVOO secoiridoids-treated human breast cancer cells**

| Gene Expression       | Significantly Over-represented BIOLOGICAL PROCESS              | ES   |
|-----------------------|----------------------------------------------------------------|------|
| <b>Down-regulated</b> |                                                                |      |
| EVOO-PE7              | Hexose Catabolic Process                                       | 1.63 |
|                       | Cell Cycle (M phase)                                           | 1.30 |
|                       | Cellular Component Assembly                                    | 1.20 |
|                       | Cellular Metabolic Process                                     | 1.05 |
|                       | Cellular Carbohydrate Metabolic Process                        | 1.00 |
|                       | Regulation of Cell Adhesion                                    | 1.00 |
|                       | DNA Metabolic Process                                          | 1.00 |
| <b>Up-regulated</b>   |                                                                |      |
| EVOO-PE7              | Developmental Process                                          | 9.16 |
|                       | Positive Regulation of Biological Process                      | 8.17 |
|                       | Biological Regulation (Regulation of Gene Expression)          | 7.68 |
|                       | Biopolymer Metabolic Process                                   | 7.16 |
|                       | Negative Regulation of Biological Process (Transcription)      | 6.68 |
|                       | Response to Stress                                             | 6.33 |
|                       | Regulation of Cell Cycle                                       | 6.17 |
|                       | Organ Morphogenesis                                            | 5.73 |
|                       | Response to Chemical Stimulus (Unfolded Protein)               | 5.31 |
|                       | Regulation of Cell Differentiation (Hemopoiesis)               | 3.87 |
|                       | Regulation of Biological Quality (Cell Growth/Cell Size)       | 3.62 |
|                       | Positive Regulation of Metabolic Process (Transcription)       | 3.41 |
|                       | Regulation of a Molecular Function (MAP Kinase Activity)       | 3.04 |
|                       | Regulation of Apoptosis (Induction of Cell Death)              | 2.73 |
|                       | Response to Wounding                                           | 2.59 |
|                       | Embryonic Pattern Specification (Tube Development)             | 2.53 |
|                       | Chromatin Assembly                                             | 2.45 |
|                       | Muscle Development (Myoblast Differentiation)                  | 2.34 |
|                       | Nitric Oxide Biosynthetic Process                              | 2.34 |
|                       | Signal Transduction                                            | 2.14 |
|                       | Post-Translational Protein Modification (Ubiquitin)            | 2.09 |
|                       | Reproduction (Gamete Generation)                               | 1.98 |
|                       | Embryonic Pattern Specification (Cell Fate Commitment)         | 1.85 |
|                       | Tissue Development (Epidermis)                                 | 1.84 |
|                       | Tube Development (Lung)                                        | 1.74 |
|                       | Regulation of Body Fluid Levels (Hemostasis)                   | 1.72 |
|                       | Lymphocyte Differentiation (T cell activation)                 | 1.58 |
|                       | Mast Cell Cytokine Production                                  | 1.57 |
|                       | Cell Migration                                                 | 1.56 |
|                       | Cell Activation (B cell activation)                            | 1.48 |
|                       | Protein Ubiquitination                                         | 1.37 |
|                       | Skeletal Development (Bone Remodeling)                         | 1.28 |
|                       | Negative Regulation of Phosphorylation (Lymphocyte Activation) | 1.27 |
|                       | Inflammatory Response                                          | 1.09 |
|                       | Protein Digestion (Collagen Catabolic Process)                 | 1.07 |
|                       | Negative Regulation of Hormone Secretion                       | 1.06 |
|                       | mRNA Metabolic Process                                         | 1.00 |
|                       | Polyamine Metabolic Process                                    | 1.00 |

DAVID (Database for Annotation, Visualization and Integrated Discovery) provides tools and statistical methods for discovering enriched processes and pathways within diverse and disparate gene lists. We used the DAVID functional annotation tool, which provides Gene Ontology (GO) term enrichment analysis, to highlight the most relevant GO terms associated with the gene list generated by treatment of JIMT1 breast cancer cells with EVOO secoiridoids. We used extended annotation coverage that not only included GO terms but also protein-protein interactions, disease associations, bio-pathways, gene functional summaries, gene tissue expression, and relevant literature. Gene functional classifications of EVOO secoiridoid-responsive gene expression changes in human breast cancer cells were evaluated in terms of enrichment scores (for each gene cluster), which were calculated as the geometric mean of all the enrichment p-values (EASE [ES] scores) for each annotation term associated with the gene members in the group. The geometric mean is a relative score instead of an absolute p-value, and therefore, minus log transformation is applied on the average p-values. A higher score for a group indicates that the gene members in the group are involved in more important (enriched) terms and, consequently, more attention should be given to them. An enrichment score of 1.3 is equivalent to non-log scale 0.5. Thus, more attention should be given to groups with scores  $\geq 1.3$ .
